# Supplementary material
Source: PubMed Central journal article supplement (PMC7289057)

Supplementary Data

Figure 1. In vitro survival based on radiation dosage with transfection of miR-451a mimic.<sup>24</sup>

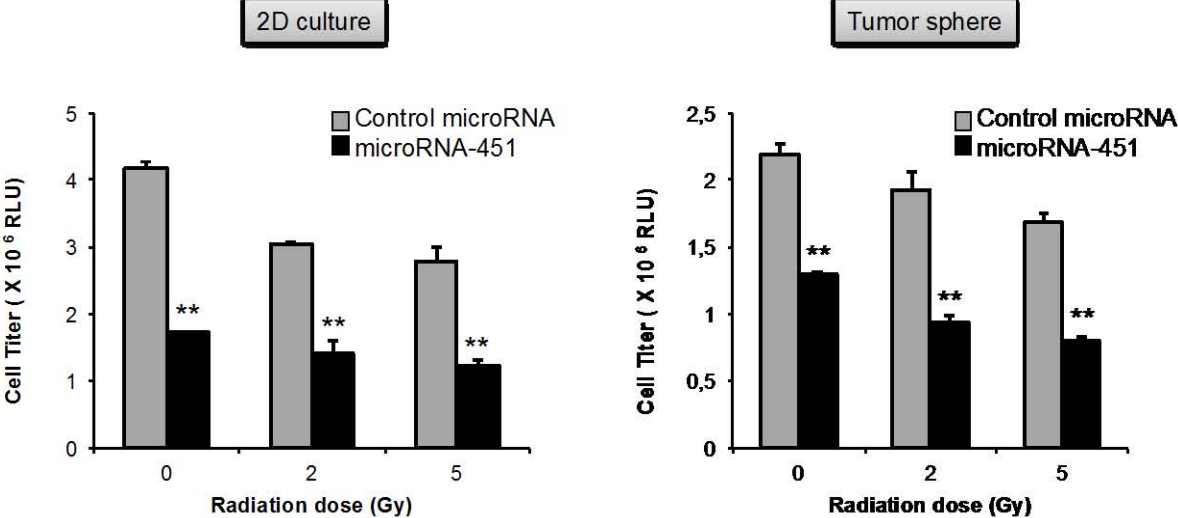

Figure 2. In vitro survival based on radiation dosage with transfection of miR-451a inhibitor.<sup>24</sup>

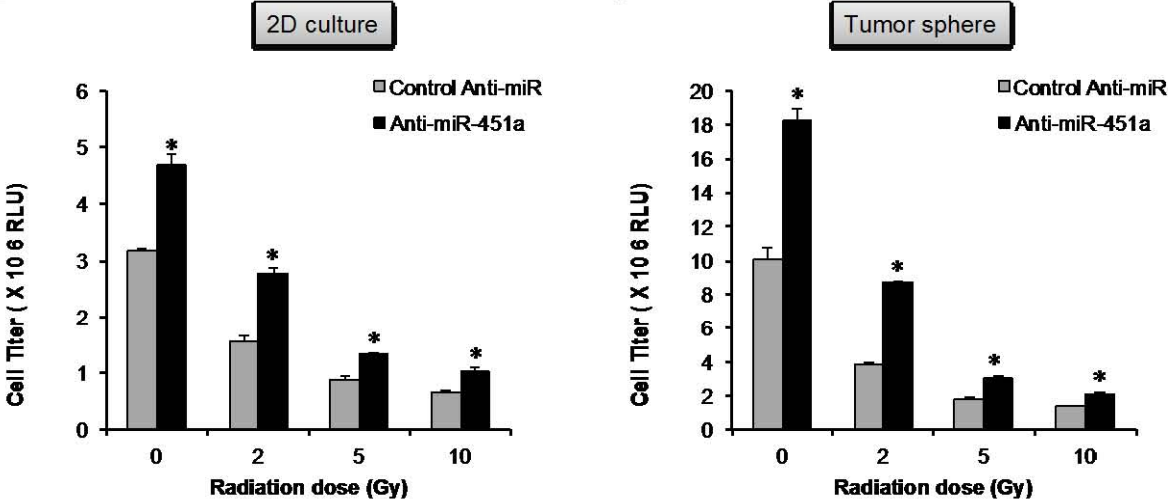

**Figure 3.** In vivo miR profile in tumor mouse model with radiation therapy and expression profile of miR-451a.<sup>24</sup>

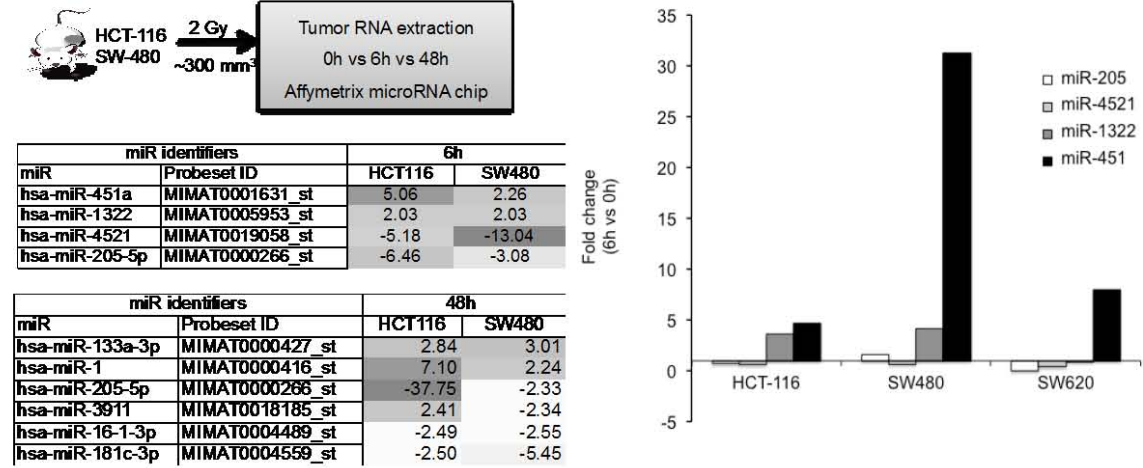

**Figure 4.** RISC Trap analysis demonstrating direct relationship of miR-451a with CAB39 and EMSY.<sup>24</sup>

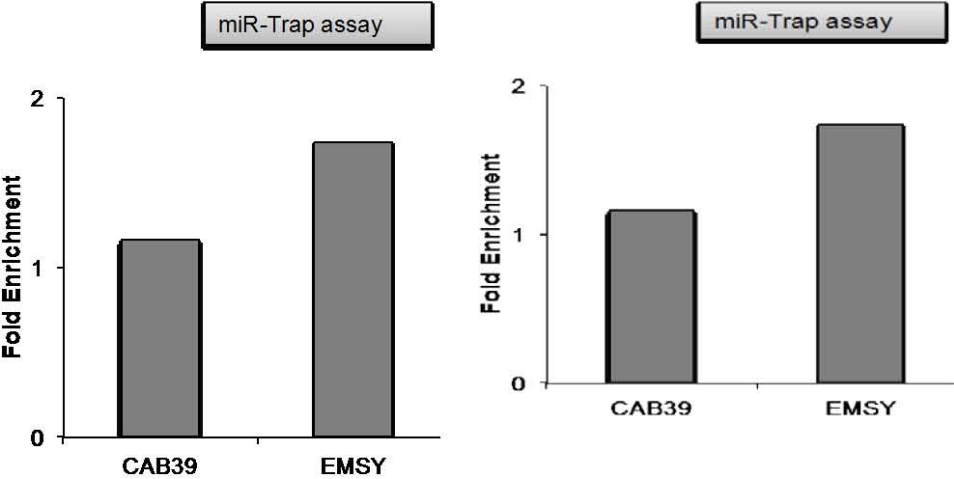

**Figure 5.** Proposed relationship of CAB39 and EMSY and mechanisms of SHP2 and RAF inhibitors.

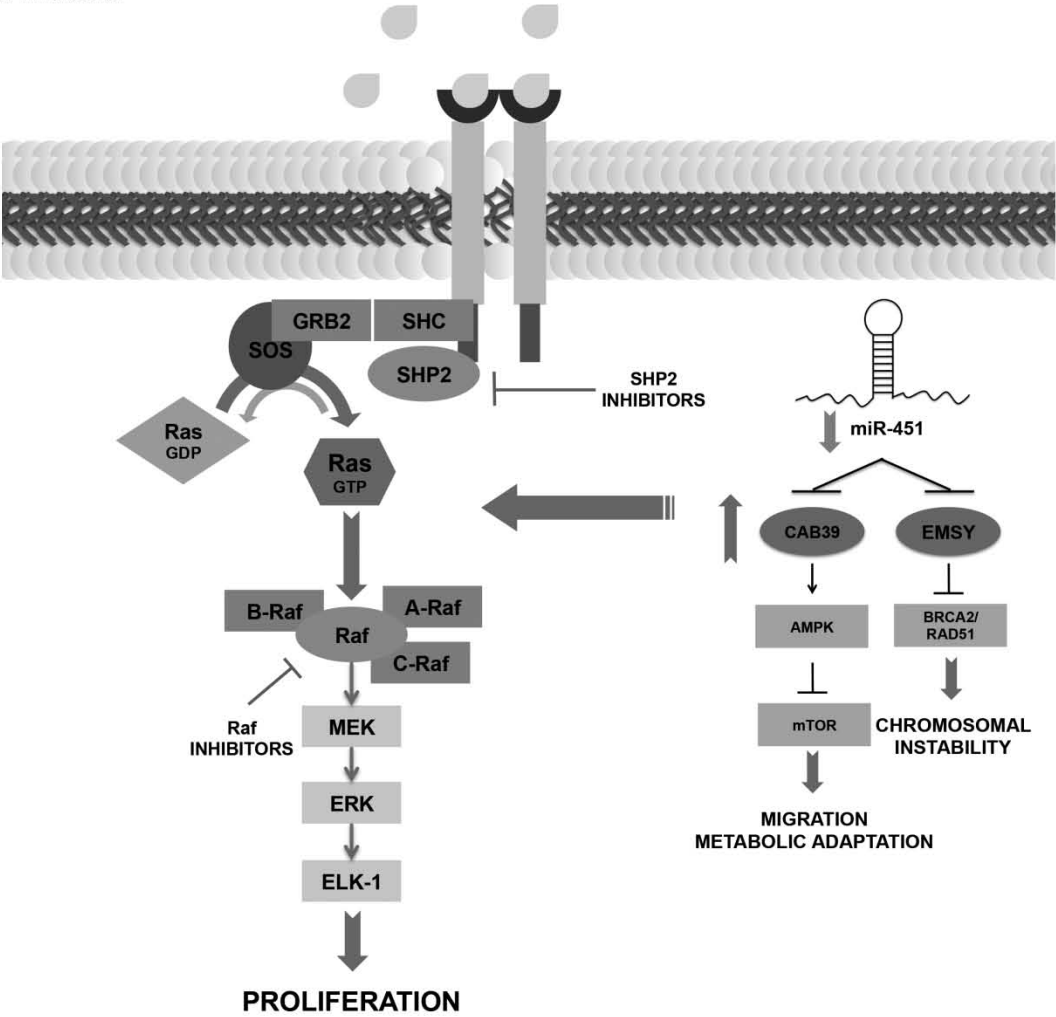

Supplement: NIHMS1584849-supplement-Supplemental_Material.pdf [file NIHMS1584849-supplement-Supplemental_Material.pdf]
